# Supplementary material for: mRNA-LNP expressing PfCSP and Pfs25 vaccine candidates targeting infection and transmission of Plasmodium falciparum
Source: Springer Nature journal article supplement (doi:10.1038/s41541-022-00577-8), 2022-12-01
Supplement: MOESM1 [file 41541_2022_577_MOESM1_ESM.pdf]

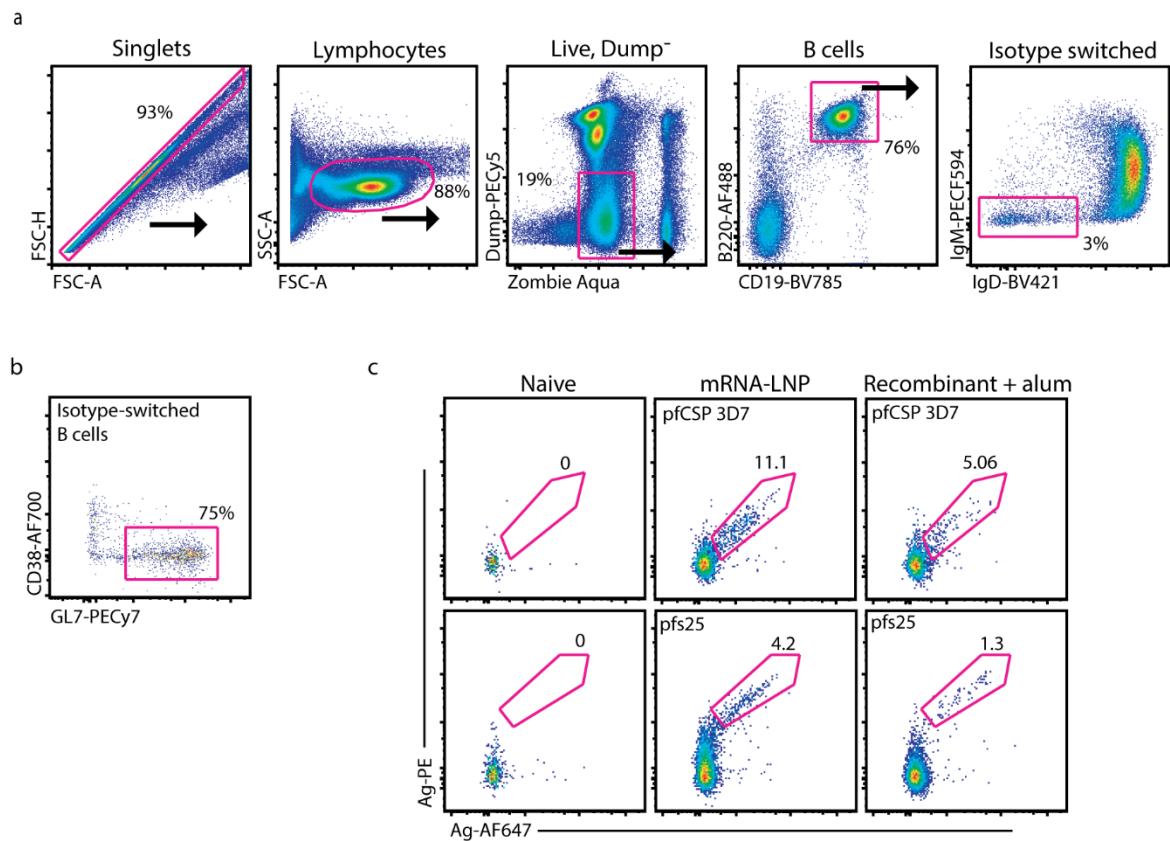

**Supplementary Figure 1. B cell gating strategy.** **a** Gating scheme to identify isotype-switched (IgD-IgM-) B cells. **b** Identification of germinal center B cells (CD38-GL7+). **c** Identification of Ag-binding B cells using fluorophore-conjugated protein probes

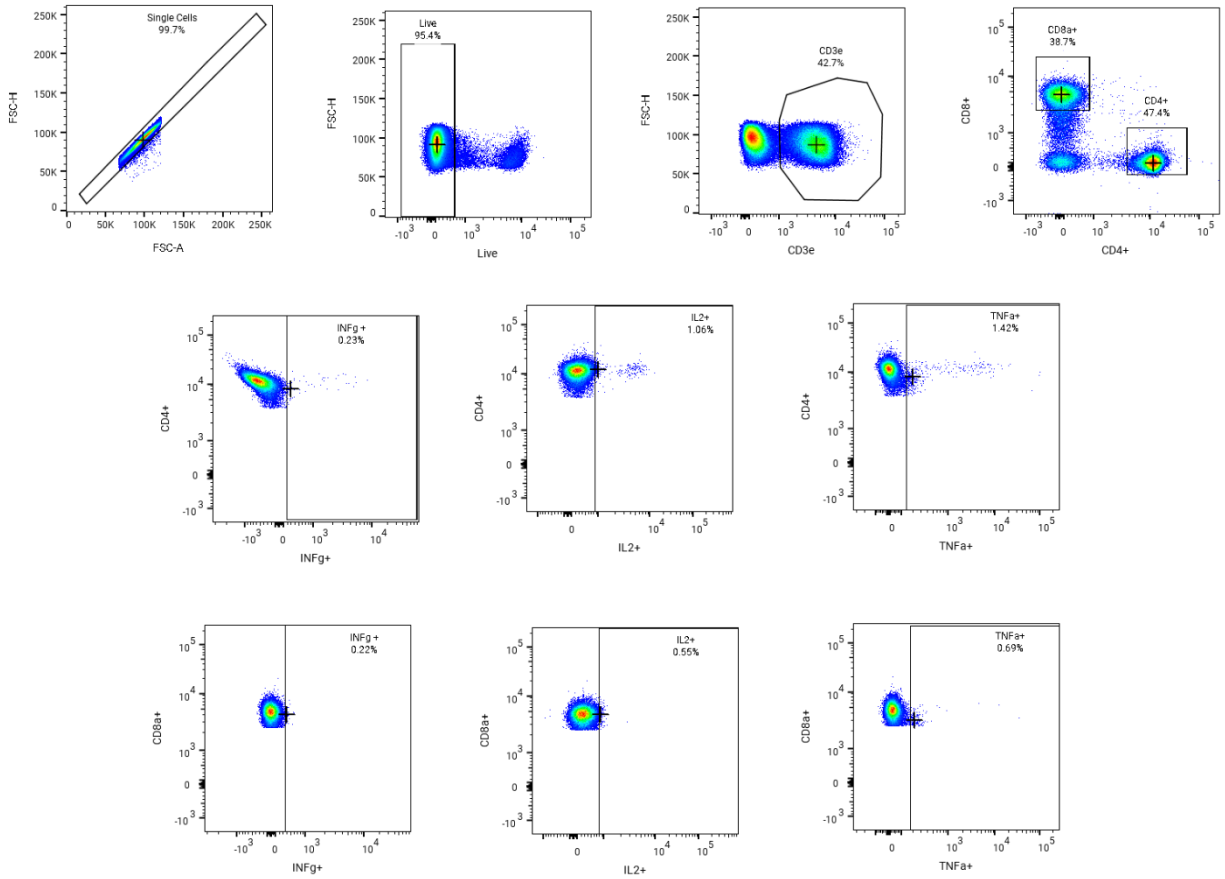

**Supplementary Figure 2. T cell gating strategy.** Gating scheme to identify cytokine-producing CD4 and CD8 T cells

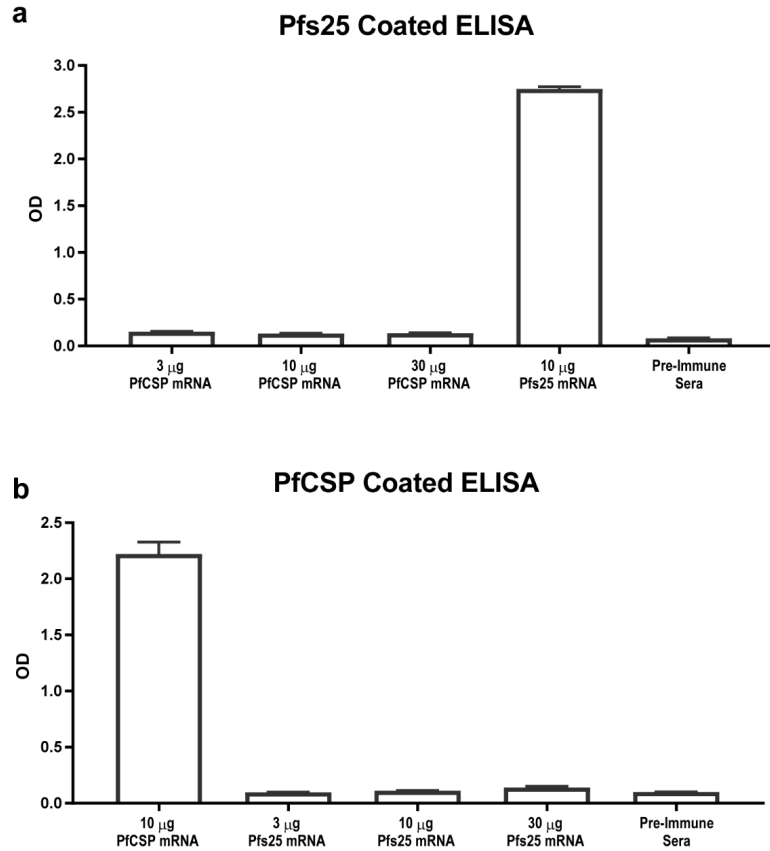

**Supplementary Figure 3. Cross-reactivity of antibody responses between Pfs25 and PfCSP antigens.**

Sera collected from the bleed, B3 (Fig 1a), were analyzed by ELISA to determine PfCSP reactivity of Pfs25 mRNA-LNP immunized mice sera and vice-versa. Pre-immune sera were used as a negative control. Immune and pre-immune sera were tested at a fixed 1:500 dilution. Reactivity of sera to Pfs25 and PfCSP is shown in panels **a** and **b** , respectively. Error bars represent the standard deviation.

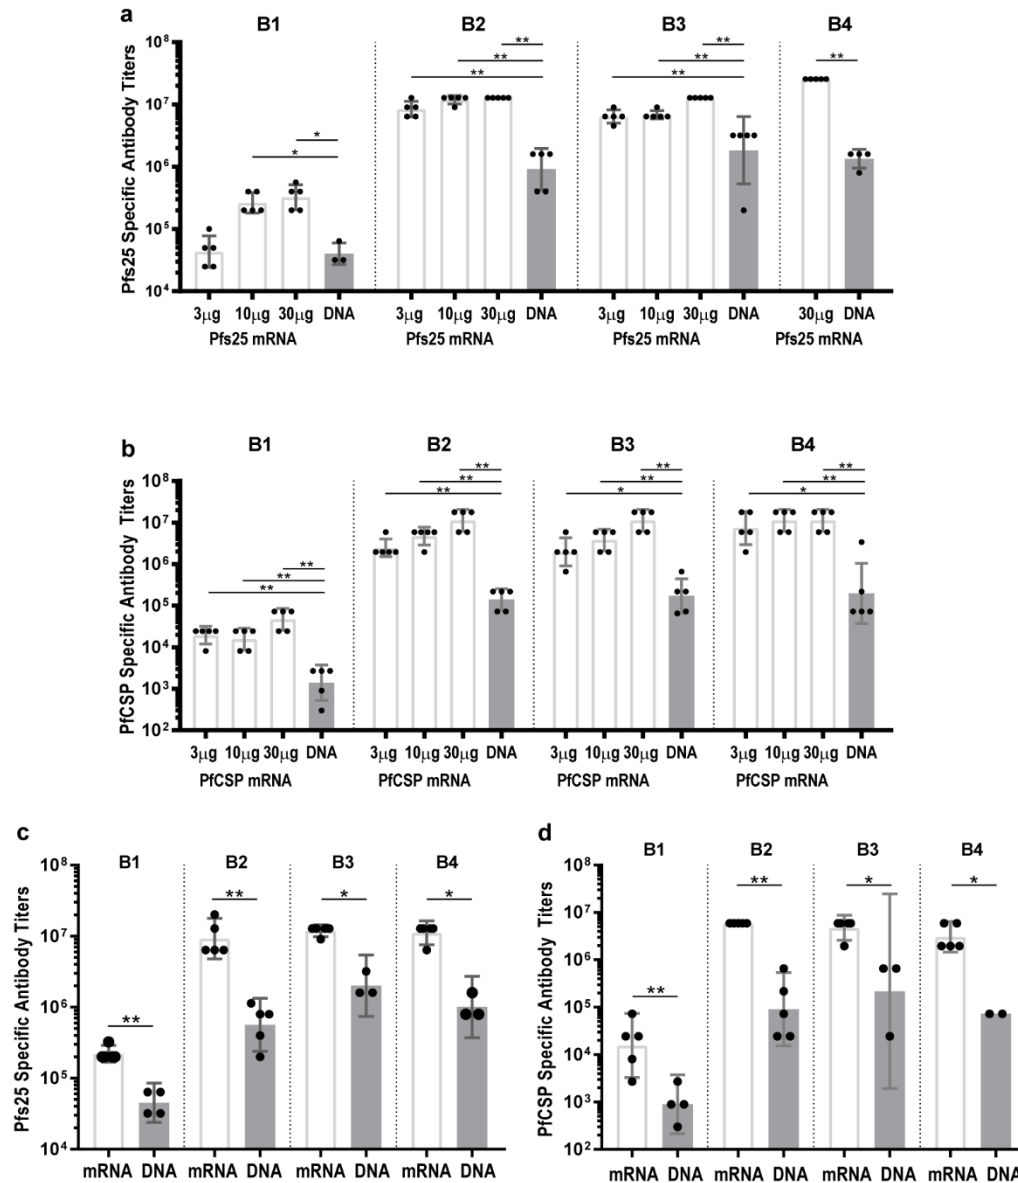

**Supplementary Figure 4. Comparison of antibody responses in mice immunized with Pfs25 mRNA-LNPs, PfCSP mRNA-LNP and DNA plasmids encoding Pfs25 and PfCSP.** Immunization and blood collection schedules are shown in Fig. 1a. Sera from bleeds at indicated time points were analyzed using ELISA to determine antigen-specific antibody titers reported as the geometric mean endpoint titers with 95% confidence intervals. Panel **a** reports Pfs25-specific antibody titers of mice immunized with Pfs25 immunogens (N=5 for all groups except DNA group at time point B1, N=3 and at B4, N=4). panel **b** reports PfCSP-specific titers of mice immunized with PfCSP immunogens (N=5 for all groups). Panel **c** and **d** report Pfs25-specific and PfCSP-specific antibody titers of mice co-immunized with Pfs25 and

PfCSP immunogens (N=5 for all groups except for DNA at time point B1, N=4, DNA at time points B3 and B4, N=3). ELISA data for mRNA immunization groups are exactly the same as in Fig. 2 and 3, however, shown here for comparison with DNA immunization groups (shaded grey). Statistical analysis was performed using a two-sided Mann-Whitney U test (\* $p < 0.05$ ; \*\* $p < 0.01$ ).

**Supplementary Table 1. A detailed list of antibodies used for B cell analysis by Flow Cytometry**

| <b>Marker</b> | <b>Clone</b> | <b>Dilution</b> | <b>Catalog<br/>Numbers</b> | <b>Source</b> |
|---------------|--------------|-----------------|----------------------------|---------------|
| B220          | RaA3-6B2     | 1:200           | 103225                     | Biolegend     |
| IgD           | 11-26c.2a    | 1:300           | 405725                     | Biolegend     |
| Zombie Aqua   | n/a          | 1:400           | 423102                     | Biolegend     |
| CD19          | 6D5          | 1:100           | 115543                     | Biolegend     |
| CD38          | 90           | 1:100           | 56-0381-82                 | Invitrogen    |
| IgM           | R6-60.2      | 1:200           | 562565                     | BD Bioscience |
| CD4           | H129.19      | 1:800           | 130312                     | Biolegend     |
| CD8           | 53-6.7       | 1:400           | 553034                     | BD Bioscience |
| Gr-1          | RB6-8C5      | 1:800           | 108410                     | Biolegend     |
| F4/80         | BM8          | 1:800           | 15-4801-82                 | Invitrogen    |
| GL7           | GL7          | 1:200           | 144620                     | Biolegend     |

**Supplementary Table 2. A detailed list of antibodies used for T cell analysis by Flow Cytometry**

| <b>Marker</b> | <b>Clone</b> | <b>Dilution</b> | <b>catalog numbers</b> | <b>Source</b> |
|---------------|--------------|-----------------|------------------------|---------------|
| CD107a        | 1D4B         | 1:100           | 553793                 | BD Bioscience |
| CD4           | GK1.5        | 1:200           | 100434                 | Biolegend     |
| CD8a          | 53-6.7       | 1:200           | 100725                 | Biolegend     |
| Live/Dead     |              | 1:200           | L34966                 | Invitrogen    |
| CD3e          | 145-2C11     | 1:200           | 100351                 | Biolegend     |
| IL-4          | 11B11        | 1:200           | 564006                 | BD Bioscience |
| IL-2          |              | 1:200           | 554429                 | BD Bioscience |
| IFN-g         | XMG1.2       | 1:200           | 557998                 | BD Bioscience |
| IL-17         | TC11-18H10.1 | 1:200           | 506940                 | BD Bioscience |
| IL-5          | TRFK5        | 1:200           | 504304                 | BD Bioscience |
| TNF-a         | MP6-XT22     | 1:200           | 557644                 | BD Bioscience |
